# Supplementary material
Source: PubMed Central journal article supplement (PMC6463275)

## Inclusion/Exclusion Diagram

| <b>Selection and Exclusion Criteria</b>     | <b>Sample Size</b> | <b>Excluded</b> |
|---------------------------------------------|--------------------|-----------------|
| Head and Neck Cancer Cases                  | 1612               | -               |
| Include oropharynx patients                 | 1058               | 554             |
| Exclude patients missing p16 status         | 637                | 421             |
| Exclude patients missing smoking pack-years | 547                | 90              |

Table 1S - Diagram of Study Population Selection for RTOG Head and Neck

Table 2S - Descriptive Statistics

| Variable                     | Level          | N = 547 | %    |
|------------------------------|----------------|---------|------|
| Study number                 | 0129           | 260     | 47.5 |
|                              | 0522           | 287     | 52.5 |
| p16 status                   | Negative       | 145     | 26.5 |
|                              | Positive       | 402     | 73.5 |
| Gender                       | Male           | 479     | 87.6 |
|                              | Female         | 68      | 12.4 |
| T stage                      | T2             | 218     | 39.9 |
|                              | T3             | 173     | 31.6 |
|                              | T4             | 156     | 28.5 |
| N stage                      | N0             | 35      | 6.4  |
|                              | N1             | 61      | 11.2 |
|                              | N2a            | 63      | 11.5 |
|                              | N2b            | 199     | 36.4 |
|                              | N2c            | 139     | 25.4 |
|                              | N3             | 50      | 9.1  |
| Age                          | 44 and younger | 42      | 7.7  |
|                              | 45-49          | 79      | 14.4 |
|                              | 50-54          | 121     | 22.1 |
|                              | 55-59          | 133     | 24.3 |
|                              | 60-64          | 102     | 18.6 |
|                              | 65-69          | 46      | 8.4  |
|                              | 70 and older   | 24      | 4.4  |
| Smoking history (pack-years) | 0              | 174     | 31.8 |
|                              | >0, <=10       | 79      | 14.4 |
|                              | >10, <=20      | 59      | 10.8 |
|                              | >20, <=40      | 117     | 21.4 |
|                              | >40            | 118     | 21.6 |

Table 3S - p16 comparisons

| Covariate                    | Statistics | Level          | p16 status     |                | Parametric P-value* |
|------------------------------|------------|----------------|----------------|----------------|---------------------|
|                              |            |                | Negative N=145 | Positive N=402 |                     |
| Study number                 | N (Col %)  | 0129           | 73 (50.34)     | 187 (46.52)    | 0.429               |
|                              | N (Col %)  | 0522           | 72 (49.66)     | 215 (53.48)    |                     |
| Gender                       | N (Col %)  | Male           | 120 (82.76)    | 359 (89.3)     | <b>0.041</b>        |
|                              | N (Col %)  | Female         | 25 (17.24)     | 43 (10.7)      |                     |
| T stage                      | N (Col %)  | T2             | 44 (30.34)     | 174 (43.28)    | <b>&lt;.001</b>     |
|                              | N (Col %)  | T3             | 43 (29.66)     | 130 (32.34)    |                     |
|                              | N (Col %)  | T4             | 58 (40)        | 98 (24.38)     |                     |
| N stage                      | N (Col %)  | N0             | 11 (7.59)      | 24 (5.97)      | 0.159               |
|                              | N (Col %)  | N1             | 22 (15.17)     | 39 (9.7)       |                     |
|                              | N (Col %)  | N2a            | 13 (8.97)      | 50 (12.44)     |                     |
|                              | N (Col %)  | N2b            | 44 (30.34)     | 155 (38.56)    |                     |
|                              | N (Col %)  | N2c            | 43 (29.66)     | 96 (23.88)     |                     |
|                              | N (Col %)  | N3             | 12 (8.28)      | 38 (9.45)      |                     |
| Age                          | N (Col %)  | 44 and younger | 8 (5.52)       | 34 (8.46)      | <b>0.035</b>        |
|                              | N (Col %)  | 45-49          | 20 (13.79)     | 59 (14.68)     |                     |
|                              | N (Col %)  | 50-54          | 21 (14.48)     | 100 (24.88)    |                     |
|                              | N (Col %)  | 55-59          | 41 (28.28)     | 92 (22.89)     |                     |
|                              | N (Col %)  | 60-64          | 28 (19.31)     | 74 (18.41)     |                     |
|                              | N (Col %)  | 65-69          | 19 (13.1)      | 27 (6.72)      |                     |
|                              | N (Col %)  | 70 and older   | 8 (5.52)       | 16 (3.98)      |                     |
| Smoking history (pack-years) | N (Col %)  | 0              | 20 (13.79)     | 154 (38.31)    | <b>&lt;.001</b>     |
|                              | N (Col %)  | >0, <=10       | 19 (13.1)      | 60 (14.93)     |                     |
|                              | N (Col %)  | >10, <=20      | 10 (6.9)       | 49 (12.19)     |                     |
|                              | N (Col %)  | >20, <=40      | 41 (28.28)     | 76 (18.91)     |                     |
|                              | N (Col %)  | >40            | 55 (37.93)     | 63 (15.67)     |                     |

\* The parametric p-value is calculated by chi-square test.

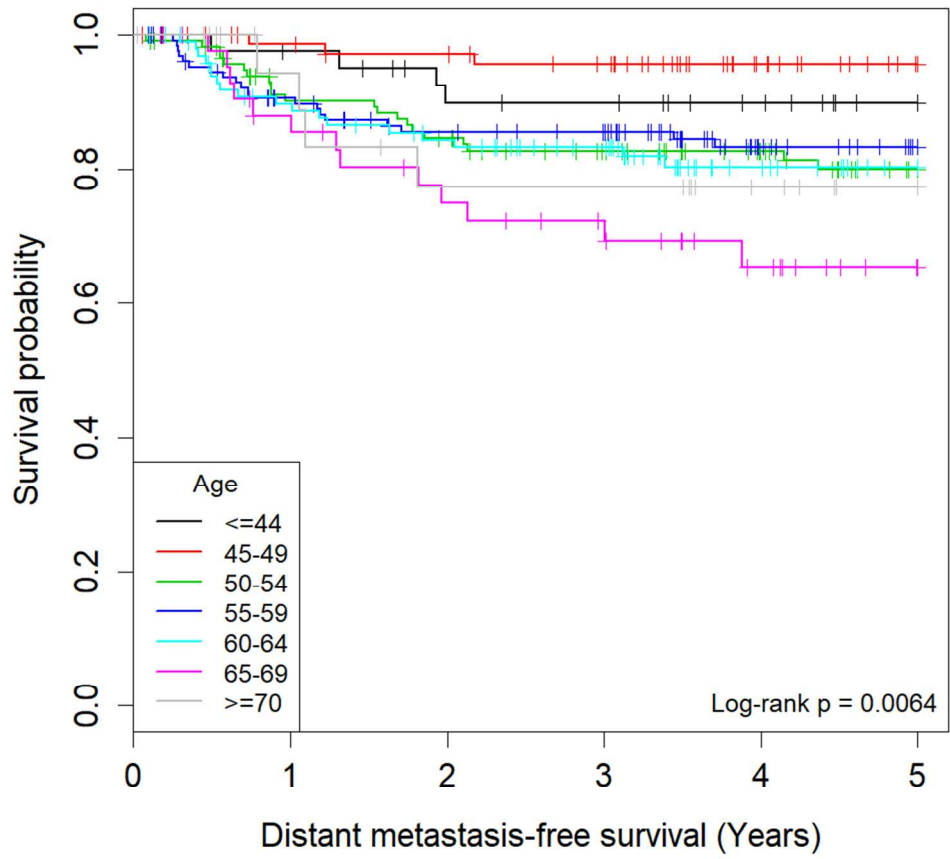

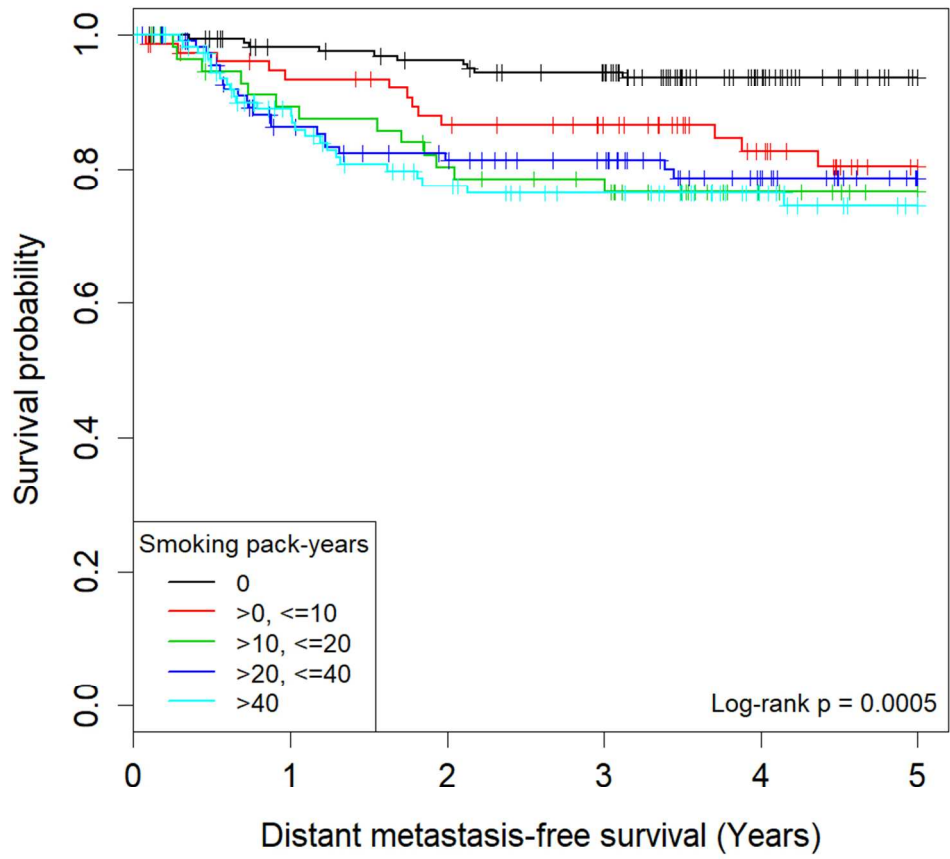

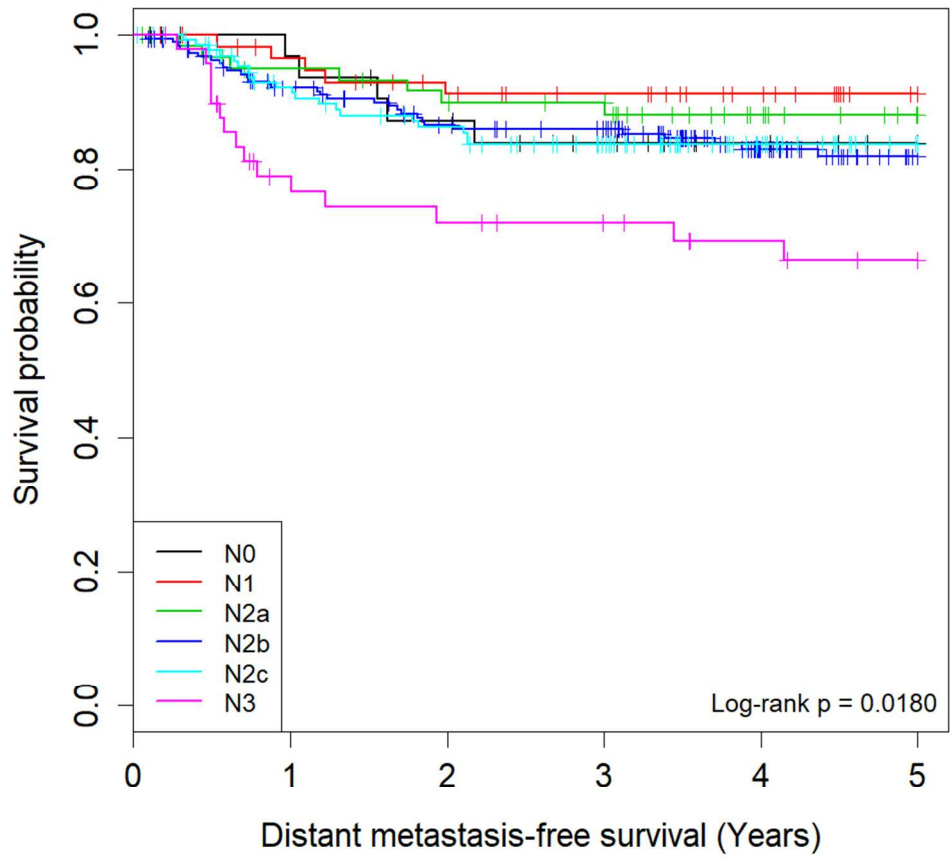

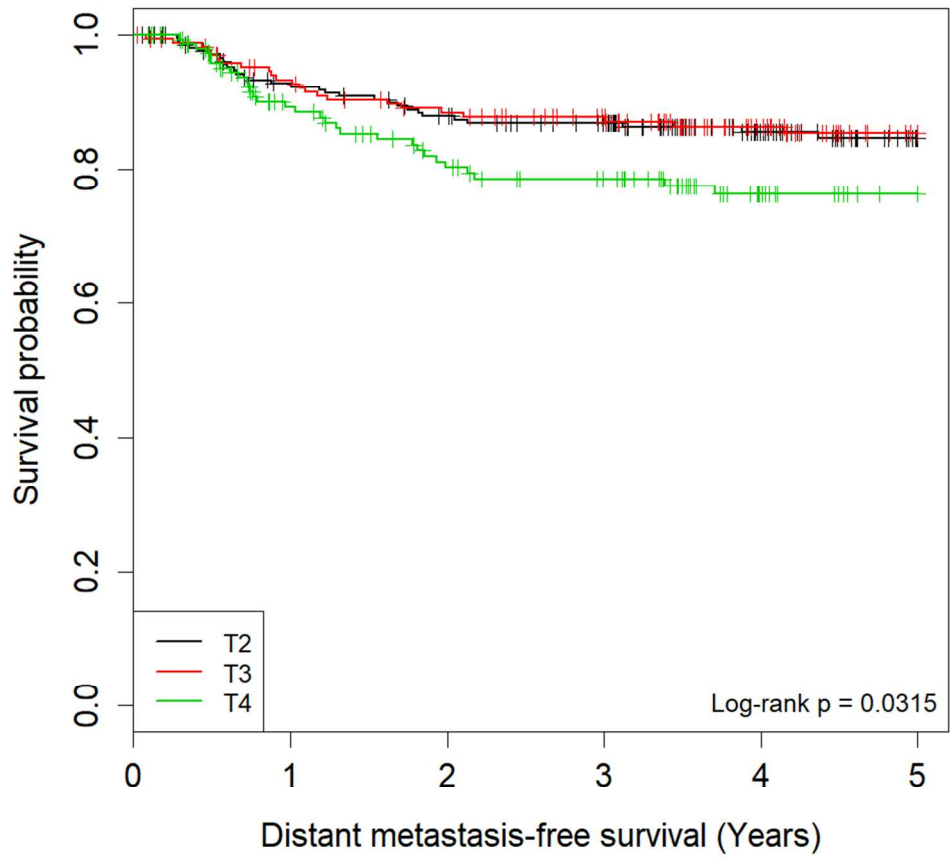

Supplement: NIHMS1013478-supplement-1.pdf [file NIHMS1013478-supplement-1.pdf]
